# Supplementary material for: Facial expression as a potential measure of both intent and emotion
Source: PubMed Central journal article supplement (PMC6279763; doi:10.1038/s41598-018-35905-3), 2018-12-04

## Facial expression as a potential measure of both intent and emotion

Irene Camerlink, Estelle Coulange, Marianne Farish, Emma M. Baxter, Simon P. Turner

### Supplementary file

**Figure S1.** Examples of facial expressions during pre-agonistic phase.

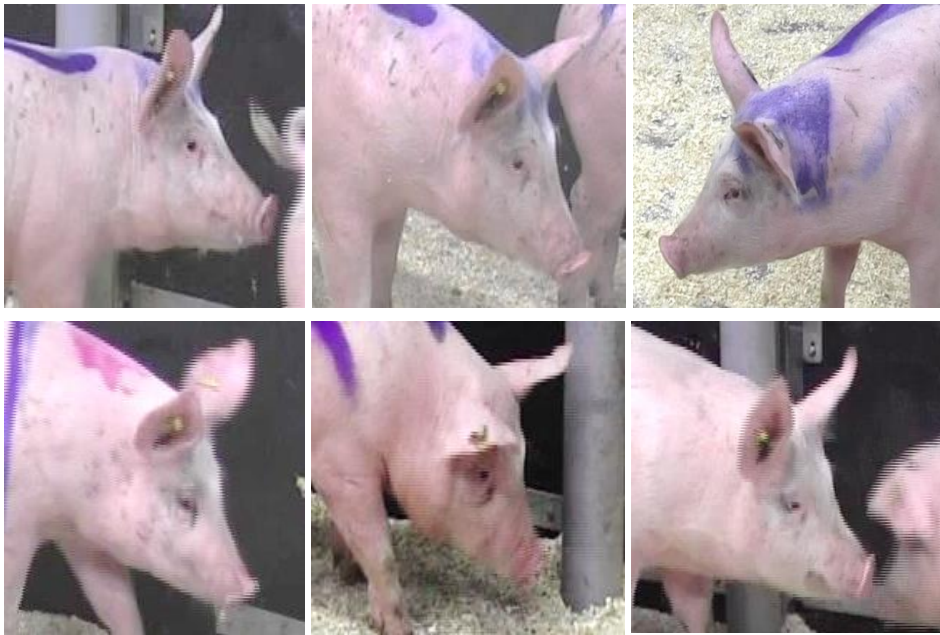

**Figure S2.** Examples of facial expressions during aggression.

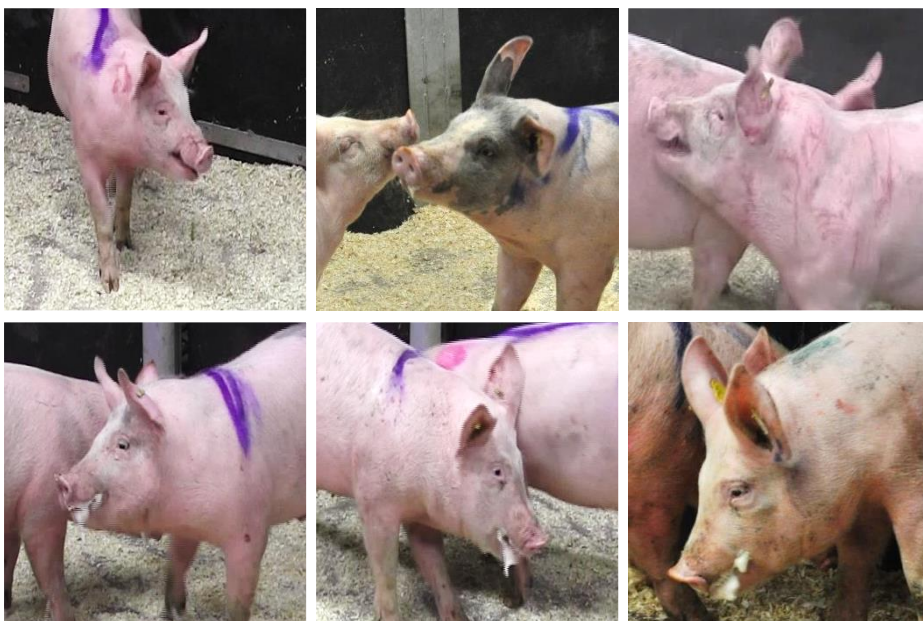

**Figure S3.** Examples of facial expressions during retreat.

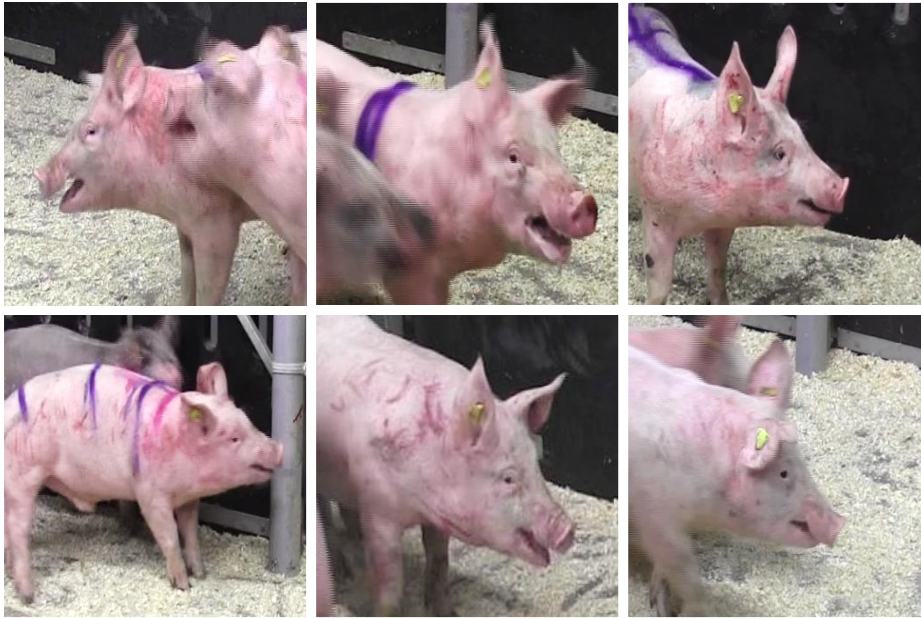

Supplement: 41598_2018_35905_MOESM1_ESM.pdf [file 41598_2018_35905_MOESM1_ESM.pdf]
